# Supplementary material
Source: MDPI journal article supplement (https://www.mdpi.com/2072-4292/16/2/411)
Supplement: s1 [file s1]

# Mapping and Analyzing the Spatiotemporal Patterns and Drivers of Multiple Ecosystem Services: A Case Study in the Yangtze and Yellow River Basins

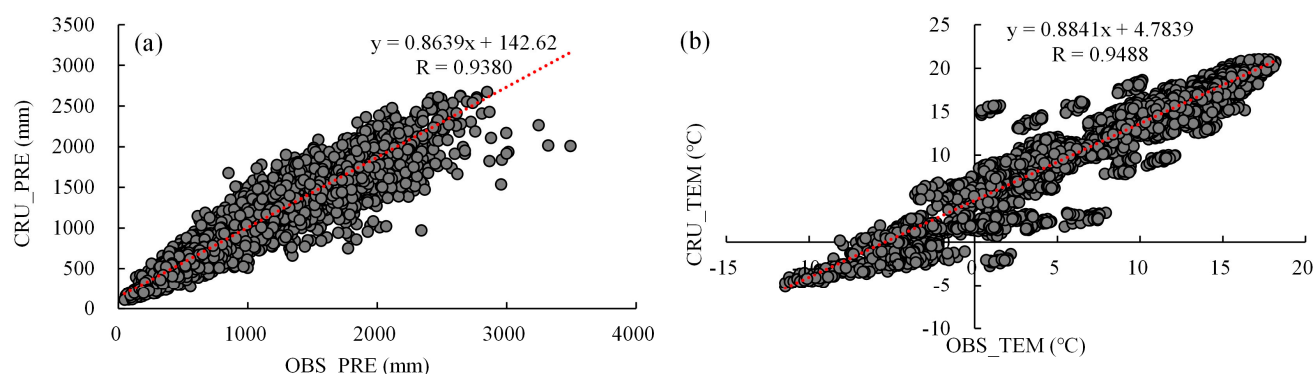

**Figure S1.** (a,b) Accuracy of CRU precipitation and temperature from 2000 to 2020 (n=7098). OBS\_PRE and CRU\_PRE represent the annual precipitation data of meteorological stations and CRU TS4.06 respectively, OBS\_TEM and CRU\_TEM represent the annual mean temperature data of meteorological stations and CRU TS4.06.

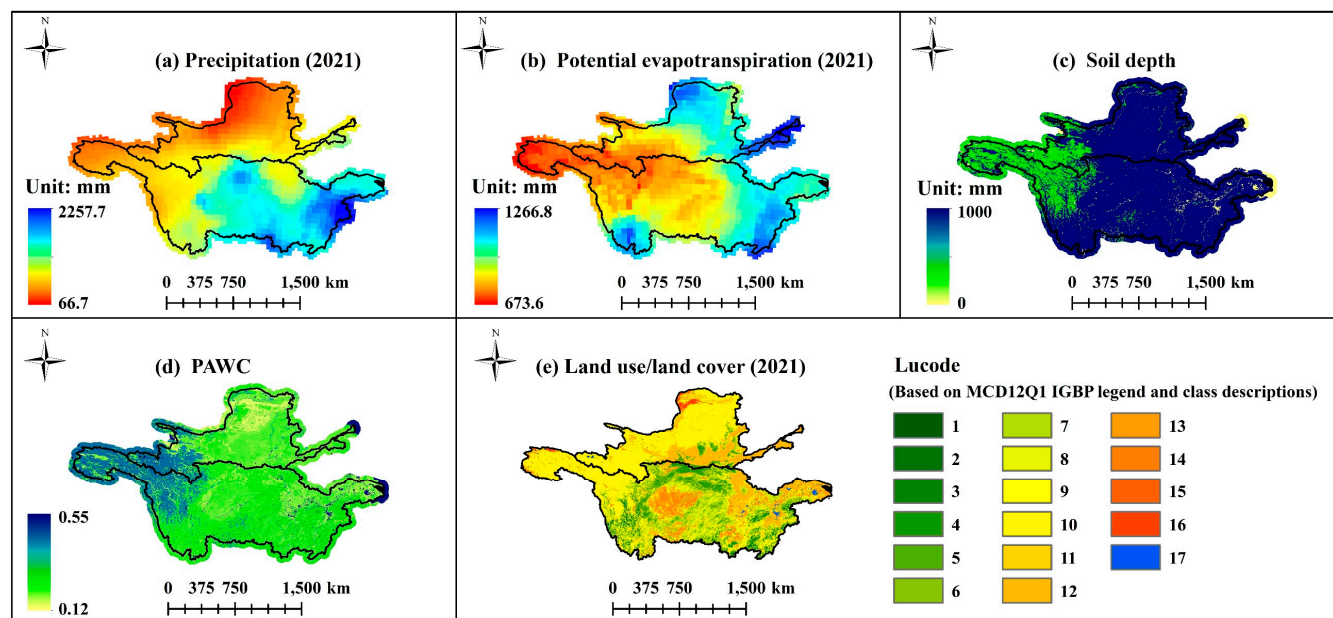

**Figure S2.** The raster data input to the InVEST water yield module. (a) Precipitation in 2021; (b) Potential evapotranspiration in 2021; (c) Soil depth; (d) PAWC-plant available water content; (e) Land use/land cover in 2021, Lucode is consistent with the Lucode in the Table S2.

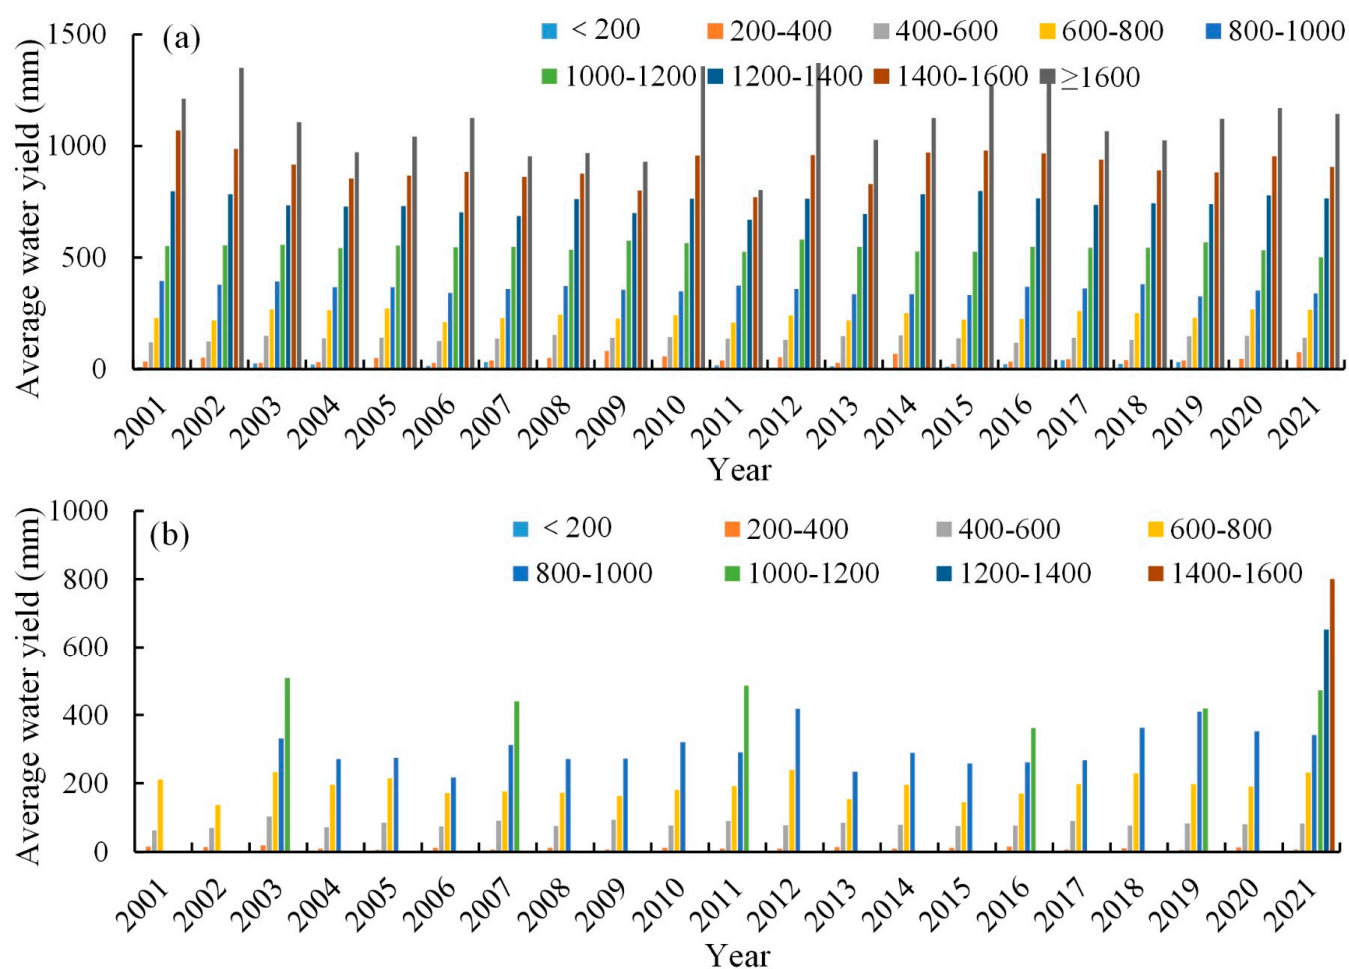

**Figure S3.** The annual average changes of WY in the YZRB (a) and the YRB (b) under different precipitation gradient grades (unit: m).

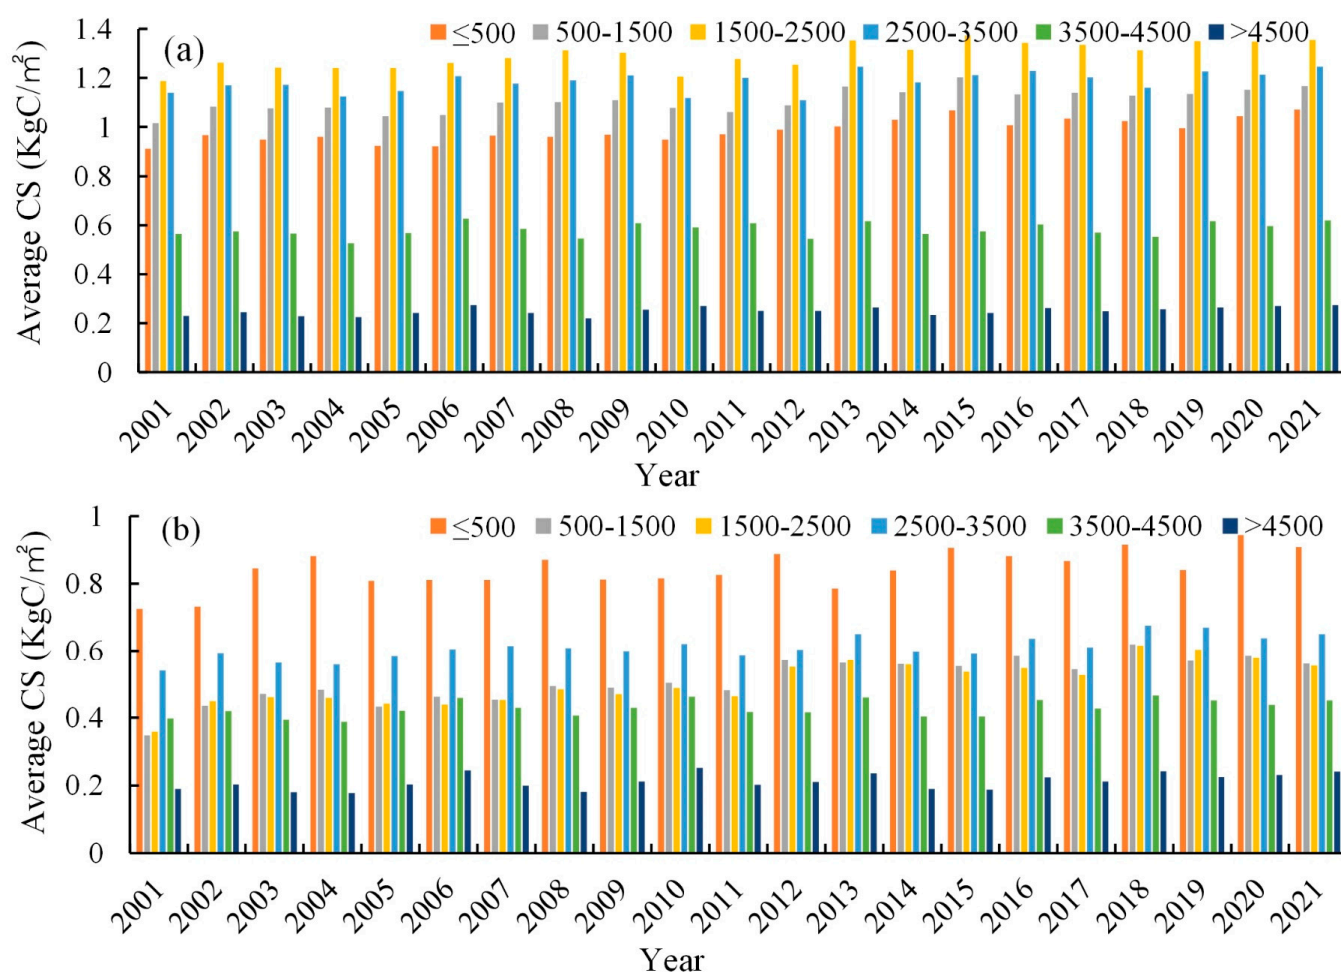

**Figure S4.** The annual average changes of CS in the YZRB (a) and the YRB (b) under different elevation gradient levels (unit: m).

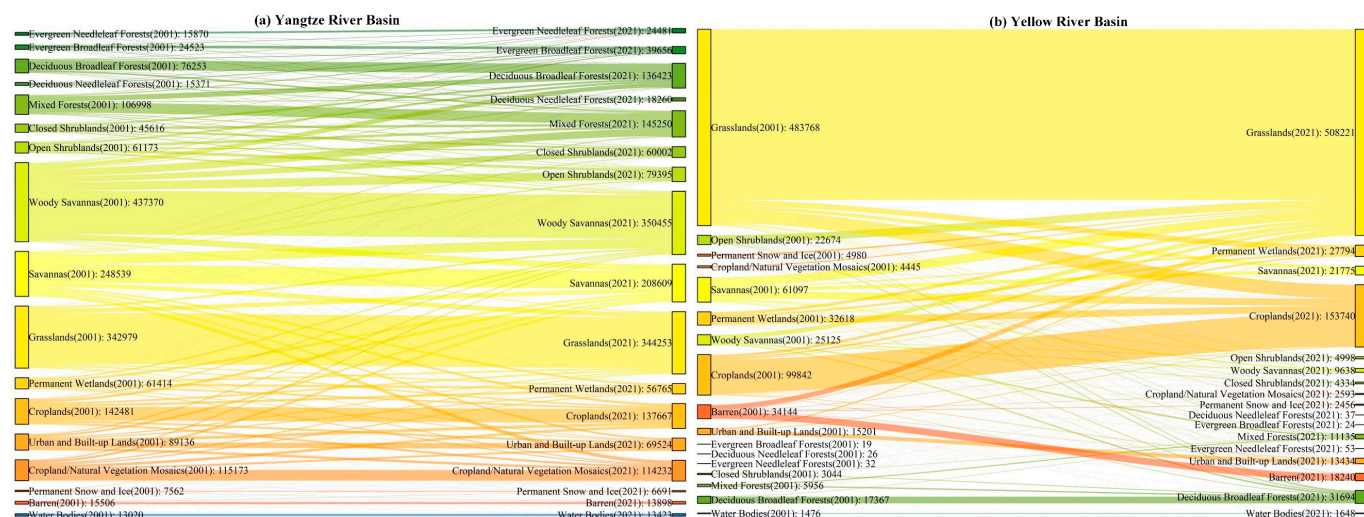

**Figure S5.** The transition of LULC based on MCD12Q1 in the YZRB and the YRB from 2001 to 2021.

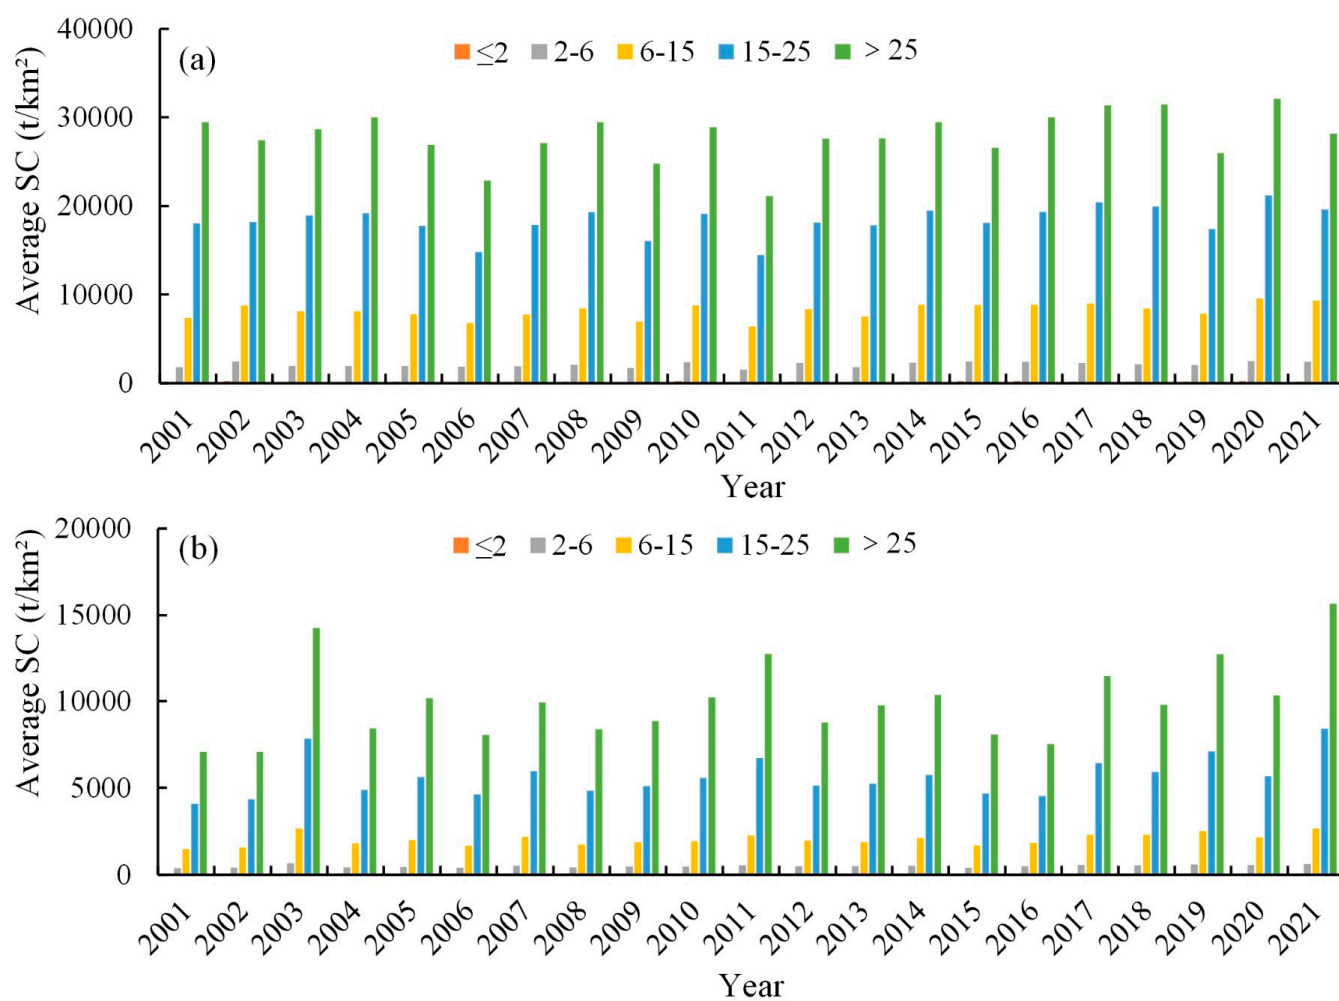

**Figure S6.** The annual average changes of SC in the YZRB (a) and the YRB (b) under different slope gradient levels (unit:  $^\circ$ ).

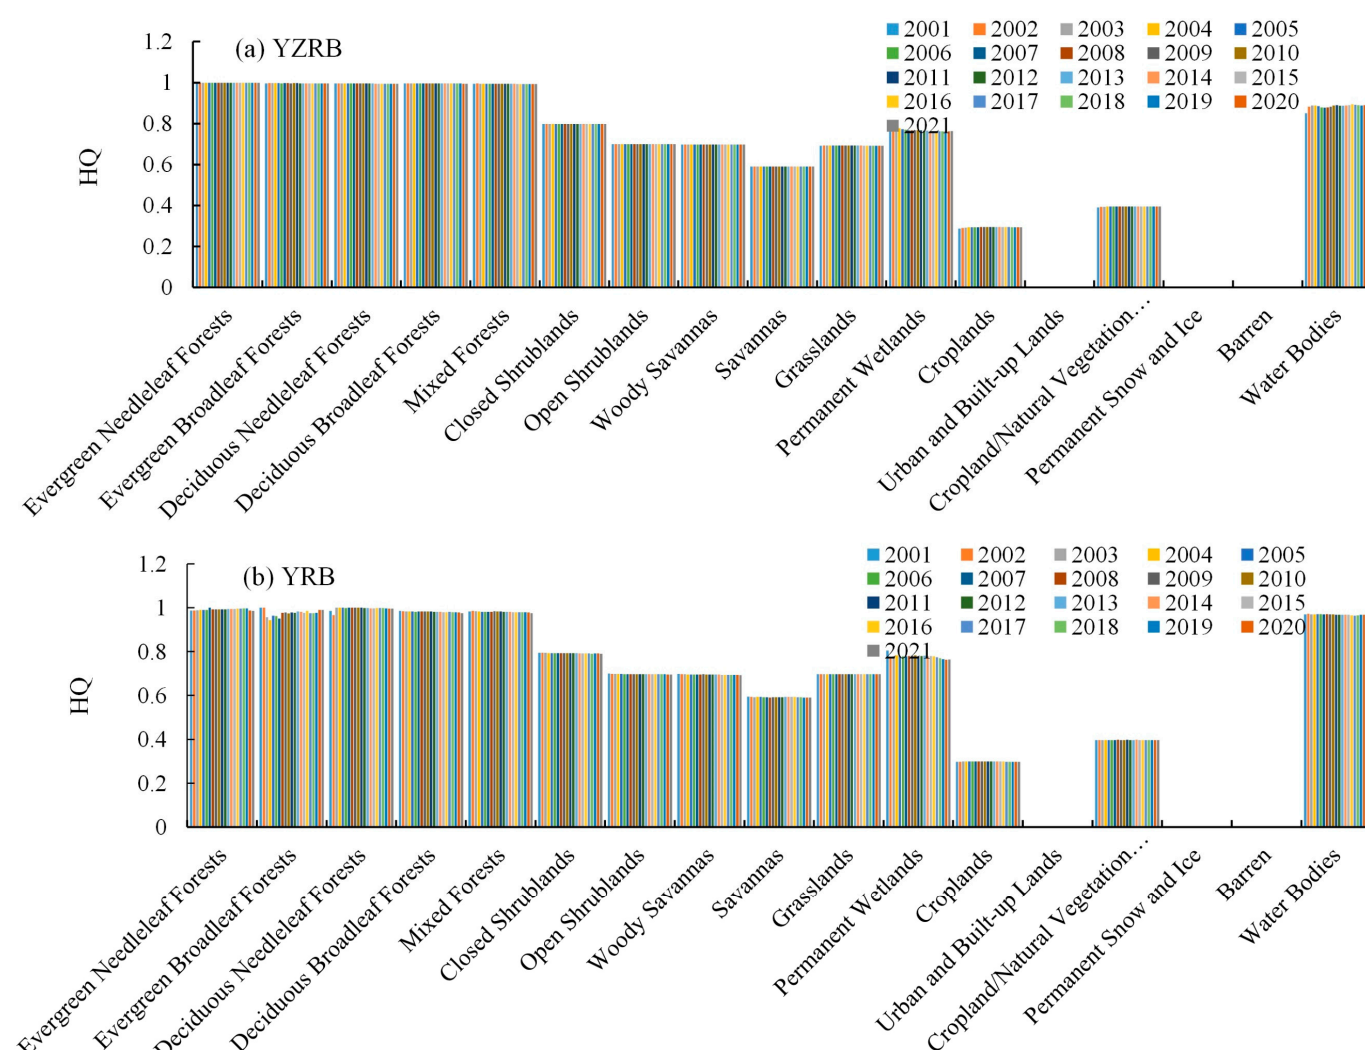

**Figure S7.** The annual average changes of HQ in the YZRB (a) and the YRB (b) under different LULC types.

**Table S1.** Biophysical parameters used in the InVEST water yield model

| LULC_description                    | Lucode | Root_depth | Kc   | LULC_veg |
|-------------------------------------|--------|------------|------|----------|
| Evergreen Needleleaf Forests        | 1      | 7000       | 1    | 1        |
| Evergreen Broadleaf Forests         | 2      | 7000       | 1    | 1        |
| Deciduous Needleleaf Forests        | 3      | 7000       | 1    | 1        |
| Deciduous Broadleaf Forests         | 4      | 7000       | 1    | 1        |
| Mixed Forests                       | 5      | 7000       | 1    | 1        |
| Closed Shrublands                   | 6      | 5200       | 0.95 | 1        |
| Open Shrublands                     | 7      | 5200       | 0.93 | 1        |
| Woody Savannas                      | 8      | 2300       | 0.65 | 1        |
| Savannas                            | 9      | 2000       | 0.65 | 1        |
| Grasslands                          | 10     | 2600       | 0.65 | 1        |
| Permanent Wetlands                  | 11     | 2000       | 1    | 0        |
| Croplands                           | 12     | 2100       | 0.65 | 1        |
| Urban and Built-up Lands            | 13     | 500        | 0.3  | 0        |
| Cropland/Natural Vegetation Mosaics | 14     | 2100       | 0.65 | 1        |
| Permanent Snow and Ice              | 15     | 100        | 0.4  | 0        |

|              |    |      |     |   |
|--------------|----|------|-----|---|
| Barren       | 16 | 300  | 0.2 | 0 |
| Water Bodies | 17 | 1000 | 1   | 0 |

\*Lucode: The coding of IGBP land cover type; LULC\_description: the name of IGBP land cover type; Kc: plant evapotranspiration coefficient for each LULC type; Root\_depth: the maximum root depth for each LULC type; LULC\_veg: 1 represents the LULC type can be vegetated, and 0 means that it cannot be vegetated.

**Table S2.** Biophysical parameters used in the InVEST Sediment Delivery Ratio model

| Description                         | Lucode | usle_c | usle_p |
|-------------------------------------|--------|--------|--------|
| Evergreen Needleleaf Forests        | 1      | 0.02   | 1      |
| Evergreen Broadleaf Forests         | 2      | 0.02   | 1      |
| Deciduous Needleleaf Forests        | 3      | 0.02   | 1      |
| Deciduous Broadleaf Forests         | 4      | 0.02   | 1      |
| Mixed Forests                       | 5      | 0.02   | 1      |
| Closed Shrublands                   | 6      | 0.08   | 1      |
| Open Shrublands                     | 7      | 0.1    | 1      |
| Woody Savannas                      | 8      | 0.09   | 1      |
| Savannas                            | 9      | 0.2    | 1      |
| Grasslands                          | 10     | 0.3    | 1      |
| Permanent Wetlands                  | 11     | 0      | 0      |
| Croplands                           | 12     | 0.5    | 0.4    |
| Urban and Built-up Lands            | 13     | 0.001  | 0      |
| Cropland/Natural Vegetation Mosaics | 14     | 0.14   | 0.5    |
| Permanent Snow and Ice              | 15     | 0.001  | 0      |
| Barren                              | 16     | 1      | 1      |
| Water Bodies                        | 17     | 0.001  | 0      |

**Table S3.** The threat factor parameters of habitat quality (HQ)

| MAX_DIST/km | WEIGHT | THREAT                              | DECAY       |
|-------------|--------|-------------------------------------|-------------|
| 8           | 0.7    | Croplands                           | linear      |
| 10          | 1      | Urban and Built-up Lands            | exponential |
| 5           | 0.5    | Cropland/Natural Vegetation Mosaics | linear      |
| 4           | 0.4    | Barren                              | linear      |

**Table S4.** The sensitive parameters of habitat quality (HQ)

| Land types                   | Habitat | Croplands | Urban and Built-up Lands | Cropland/Natural Vegetation Mosaics | Barren |
|------------------------------|---------|-----------|--------------------------|-------------------------------------|--------|
| Evergreen Needleleaf Forests | 1       | 0.8       | 1                        | 0.6                                 | 0.2    |
| Evergreen Broadleaf Forests  | 1       | 0.8       | 1                        | 0.6                                 | 0.2    |
| Deciduous Needleleaf Forests | 1       | 0.8       | 1                        | 0.6                                 | 0.2    |
| Deciduous Broadleaf Forests  | 1       | 0.8       | 1                        | 0.6                                 | 0.2    |
| Mixed Forests                | 1       | 0.8       | 1                        | 0.6                                 | 0.2    |
| Closed Shrublands            | 0.8     | 0.4       | 0.6                      | 0.3                                 | 0.2    |
| Open Shrublands              | 0.7     | 0.3       | 0.5                      | 0.2                                 | 0.2    |
| Woody Savannas               | 0.7     | 0.4       | 0.6                      | 0.3                                 | 0.1    |
| Savannas                     | 0.6     | 0.3       | 0.5                      | 0.2                                 | 0.1    |
| Grasslands                   | 0.7     | 0.4       | 0.6                      | 0.3                                 | 0.5    |
| Permanent Wetlands           | 1       | 0.8       | 0.9                      | 0.7                                 | 0.1    |
| Croplands                    | 0.3     | 0         | 0.7                      | 0                                   | 0.4    |

---

|                                        |     |     |     |     |     |
|----------------------------------------|-----|-----|-----|-----|-----|
| Urban and Built-up Lands               | 0   | 0   | 0   | 0   | 0   |
| Cropland/Natural Vegetation<br>Mosaics | 0.4 | 0   | 0.6 | 0   | 0.3 |
| Permanent Snow and Ice                 | 0   | 0   | 0   | 0   | 0   |
| Barren                                 | 0   | 0   | 0   | 0   | 0   |
| Water Bodies                           | 1   | 0.7 | 0.9 | 0.6 | 0.4 |

---

**Disclaimer/Publisher's Note:** The statements, opinions and data contained in all publications are solely those of the individual author(s) and contributor(s) and not of MDPI and/or the editor(s). MDPI and/or the editor(s) disclaim responsibility for any injury to people or property resulting from any ideas, methods, instructions or products referred to in the content.
